# Supplementary material
Source: PubMed Central journal article supplement (PMC519205)
Supplement: plntcell_tpc.104.023515_1.pdf [file plntcell_tpc.104.023515_1.pdf]

## Supplemental Data

### Figure S1. Abundance of PsbP and PsbQ proteins in *Synechocystis* 6803 membranes.

**A.** PsbP. **B.** PsbQ. **C.** CP47. The abundance of PsbP, PsbQ, and CP47 proteins in isolated membranes was determined by comparative immunostaining. The signal intensity for each antigen band was plotted against the concentration of antigen loaded on the gel. Each line was generated as a standard linear curve fit. Beside each graph, the immunoblot for the corresponding protein in 5  $\mu\text{g}$  (PsbP and PsbQ) or 1  $\mu\text{g}$  (CP47) chlorophyll-containing wild type membranes is shown.

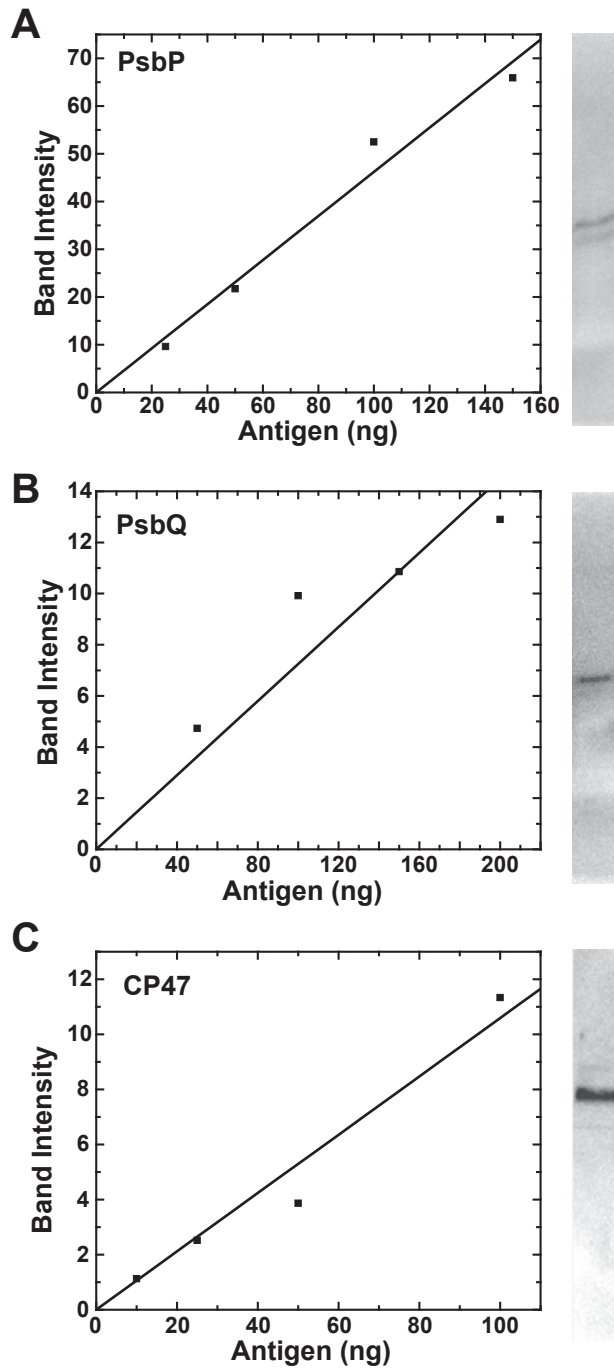

Figure S1  
Thornton et al, 2004
